# Supplementary material for: Neanderthal ancestry drives evolution of lipid catabolism in contemporary Europeans
Source: PubMed Central journal article supplement — Nat Commun. 2014 Apr 1;5:3584. doi: 10.1038/ncomms4584 (PMC3988804; doi:10.1038/ncomms4584), 2014-04-01
Supplement: ncomms4584-s1.pdf [file ncomms4584-s1.pdf]

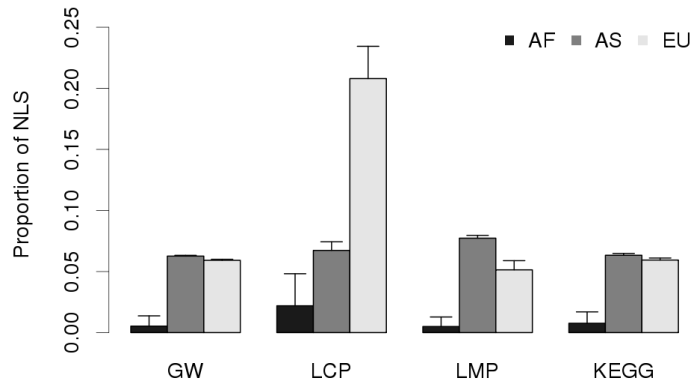

**Supplementary Figure 1.** Average proportions of NLS in contemporary African (AF, black), Asian (AS, dark gray) and European (EU, light gray) populations calculated based on sequence data from the 1000 genomes project<sup>13</sup>.

The proportions were calculated for the whole genome (GW,  $n=1,158,559$  sites), lipid catabolic process (LCP,  $n=498$  sites) genes, lipid metabolic process (LMP,  $n=5,851$  sites) genes, and all genes annotated in KEGG pathways (KEGG,  $n=140,915$  sites). The error bars show the standard deviation of the NLS proportion estimates.

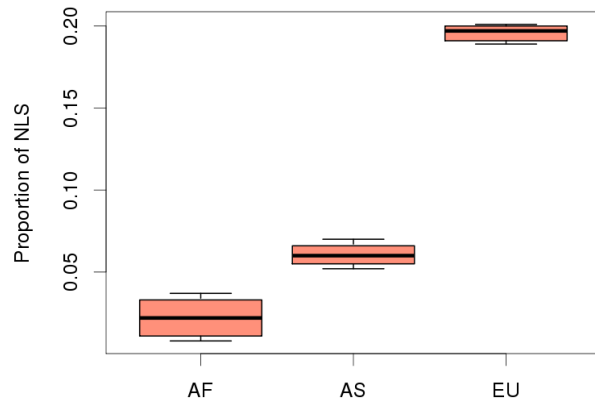

**Supplementary Figure 2.** Robustness estimates for the average proportions of NLS located within genes annotated in the LCP term in contemporary African, European and Asian populations.

The boxes show quartiles and the median of the data, the whiskers extend to the minimum and maximum data values located within 0.5 interquartile range from the box. The variance shown by the boxplots was calculated by bootstrapping genomic sites ( $n=498$ ) 1,000 times.

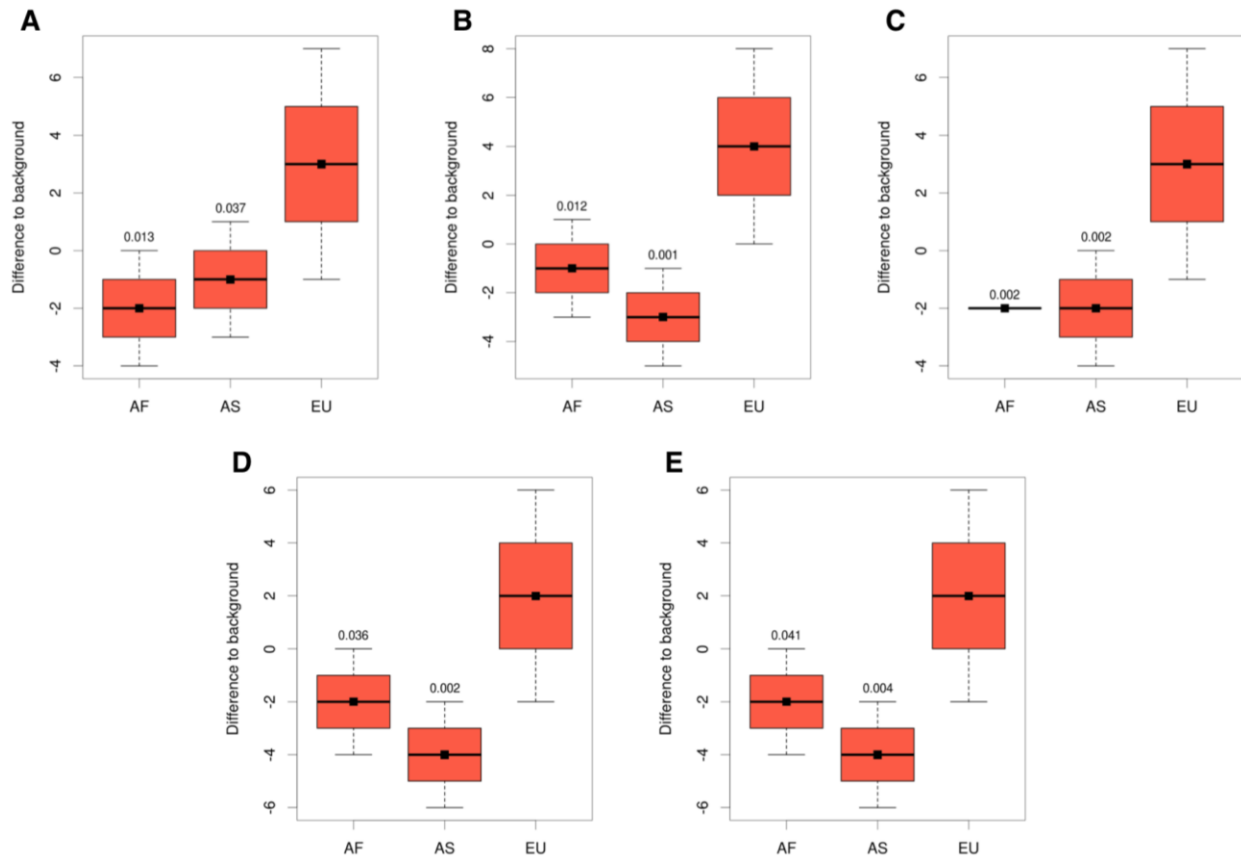

**Supplementary Figure 3.** Positive selection signal in LCP genes estimated using CMS scores<sup>25</sup>.

Black squares represent the number of sites with the positive selection signal, measured as a CMS score higher or equal to a CMS score threshold of 2 (A), 1 (B) or 0.5 (C-E) in the LCP gene regions in human populations of European (EU), Asian (AS) and African (AF) descent. For each population, the numbers of sites in the LCP term were normalized to the numbers of sites passing the same CMS score threshold in the same number of gene regions sampled within the same population among all annotated genes (A-C), among all protein-coding genes (D), and among protein-coding genes directly linked with non-LCP metabolic pathways according to KEGG annotation (E). The boxplots represent variation of normalized site number estimates obtained by bootstrapping LCP gene regions 1,000 times. The boxes show quartiles and the median of the data, the whiskers extend to the minimum and maximum data values located within 0.5 interquartile range from the box. The numbers above the boxplots show the proportion of the normalized site numbers in Europeans (EU), observed in 1,000 bootstraps over LCP gene regions ( $n=38$ ), that were less or equal to the normalized site numbers in Africans (AF) or Asians (AS).

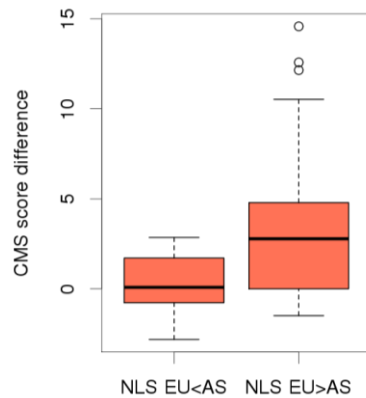

**Supplementary Figure 4.** Positive selection signal measured using CMS scores for genes within the LCP term in contemporary humans of European decent.

On the right, difference of CMS scores in Europeans to CMS scores in Asians for LCP genes ( $n=45$ ) containing excess of NLS in Europeans compared to Asians (EU>AS). On the left, difference of CMS scores in Europeans to CMS scores in Asians for LCP genes ( $n=20$ ) containing fewer NLS in Europeans compared to Asians (EU<AS). The boxes show quartiles and the median of the data, the whiskers extend to the minimum and maximum data values located within 0.5 interquartile range from the box.

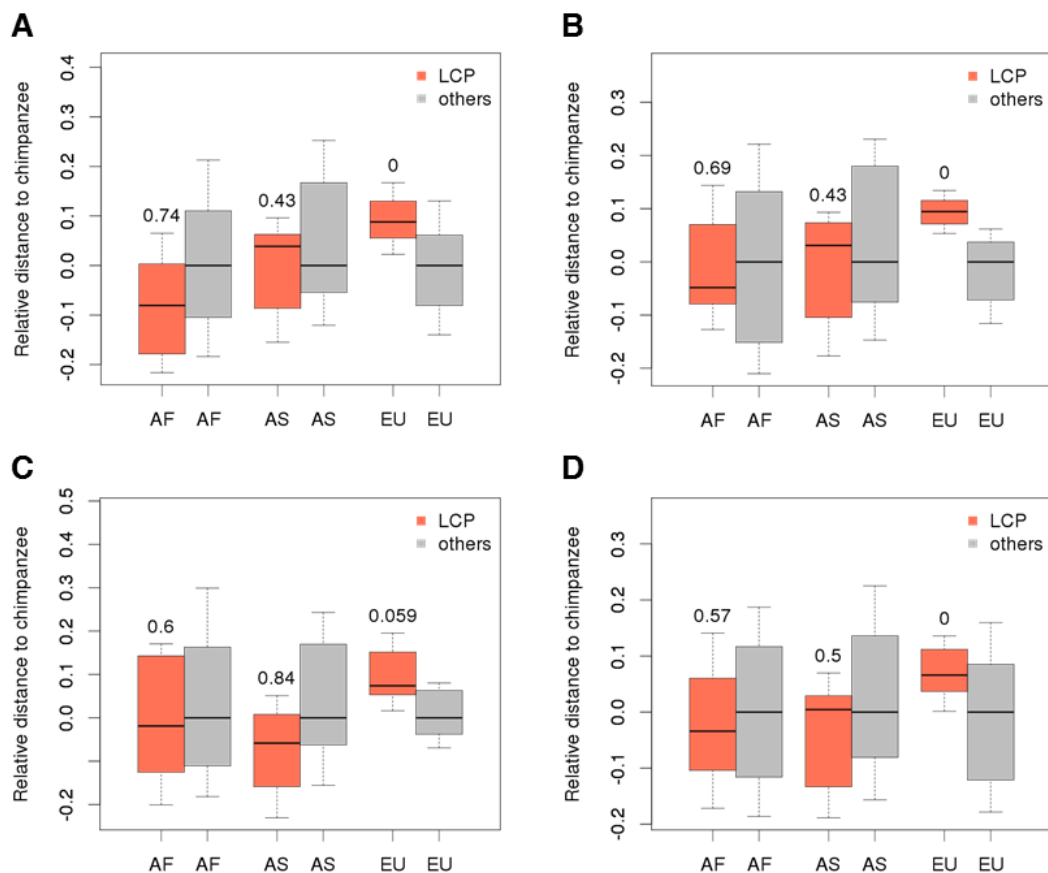

**Supplementary Figure 5.** Metabolite concentration divergence between chimpanzees and three human populations in the LCP term and other metabolic pathways, and controlled for differences in sex, age, postmortem delay and tissue preservation based on RNA integrity estimates (RIN values) among species and populations.

The boxplots show the distribution of divergence estimates measured between chimpanzees and humans of African (AF), Asian (AS) and European (EU) descent for seven metabolic categories directly linked to LCP genes (red) and metabolites in other metabolic pathways (gray). The boxes show quartiles and the median of the data, the whiskers extend to the minimum and maximum data values located within 0.5 interquartile range from the box. The variance shown by the boxplots was calculated by bootstrapping mass-spectrometry peaks ( $n=1,090$  for LCP and  $n=163$  for other metabolite categories) 1,000 times. To minimize the influence of environmental differences among populations, metabolic divergence in the LCP term was normalized to the divergence based on all other metabolic pathways within the same population. The numbers above the red boxplots show the proportion of values from the LCP divergence distribution that were smaller than, or equal to, the divergence values calculated based on other metabolic pathways shown by the gray boxplots. The distributions shown are based on residuals of the linear regression models used to exclude possible linear effects of differences in (A) sex, (B) age, (C) postmortem delay and (D) tissue preservation based on RNA integrity estimates (RIN values) among species and populations.

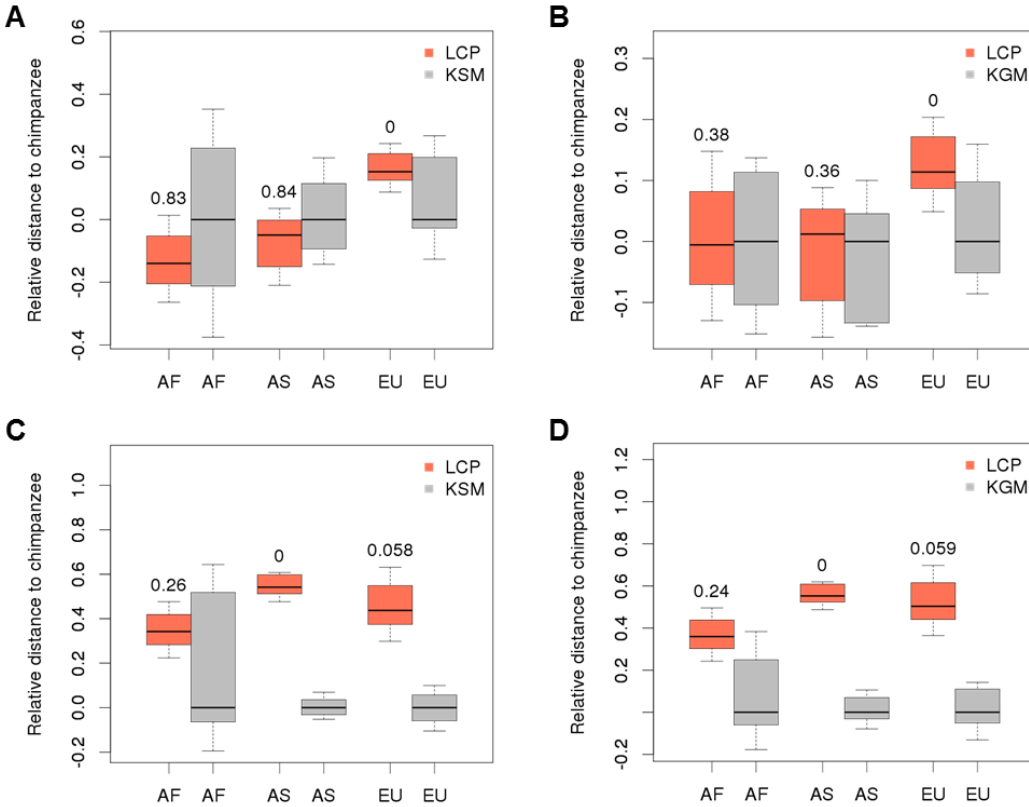

**Supplementary Figure 6.** Lipid concentration and gene expression divergence in LCP and two other metabolic pathways: KEGG sphingolipid metabolism (KSM) and KEGG glycerolipid metabolism (KGM).

(A) and (B) Lipid concentration divergence in LCP relative to KSM (A) or KGM (B) pathways in three human populations. The boxplots show the distribution of divergence estimates measured between chimpanzees and humans of African (AF), Asian (AS) and European (EU) descent for seven metabolic categories directly linked to LCP genes (red), as well as for five metabolic categories in KSM pathway or for five metabolic categories in KGM pathway (gray). (C) and (D) Gene expression divergence in LCP relative to KSM (C) or KGM (D) pathways in three human populations. The boxplots show the distribution of divergence estimates measured between chimpanzees and humans of AF, AS and EU descent for LCP genes directly linked to the seven metabolic categories (red), as well as for KSM or KGM genes directly linked to corresponding metabolites (gray). The boxes show quartiles and the median of the data, the whiskers extend to the minimum and maximum data values located within 0.5 interquartile range from the box. The variance shown by the boxplots was calculated by bootstrapping mass-spectrometry peaks ( $n=1,090$  for LCP,  $n=154$  for KSM, and  $n=474$  for KGM) and RPKM values ( $n=6$  for LCP,  $n=24$  for KSM, and  $n=12$  for KGM) 1,000 times. To minimize the influence of environmental differences among populations, metabolic/gene expression divergence in the LCP term was normalized to the divergence of KSM or KGM pathways within the same population. The numbers above the red boxplots show the proportion of values from the LCP divergence distribution that were smaller than, or equal to, the divergence values calculated based on KSM or KGM pathways shown by the gray boxplots.

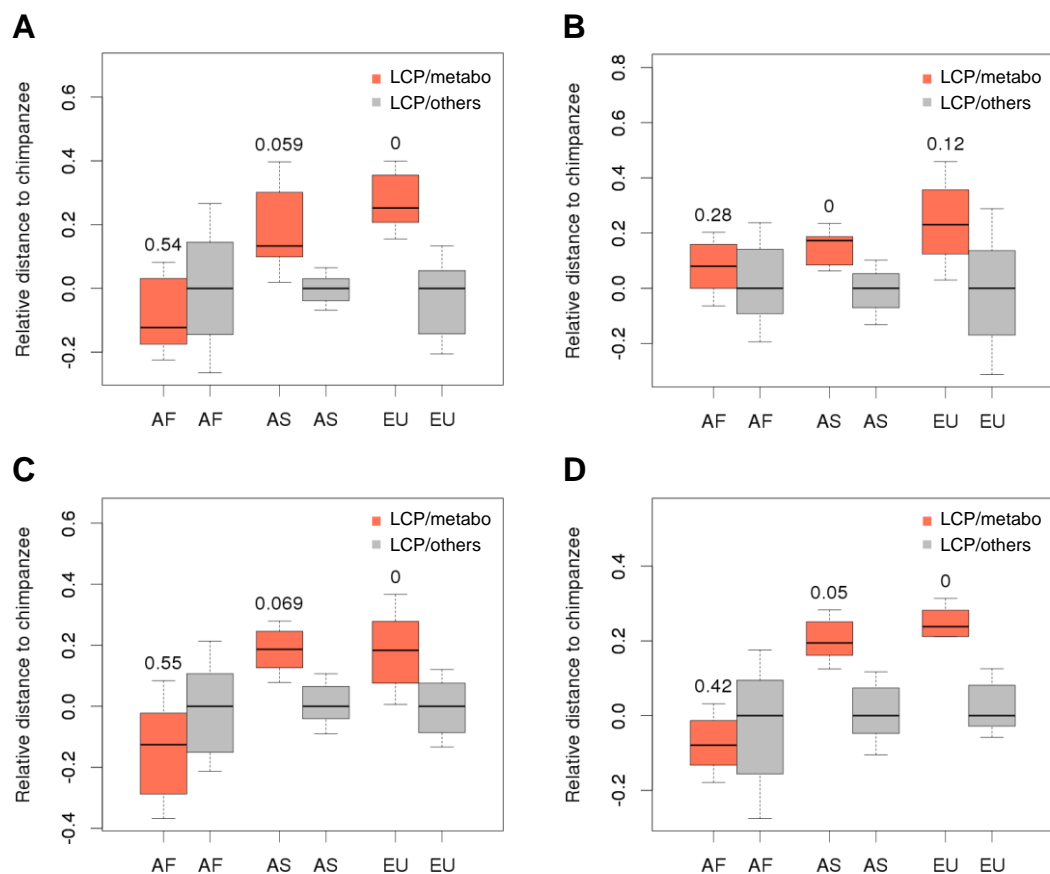

**Supplementary Figure 7.** Gene expression divergence between chimpanzees and three human populations in the LCP term and other genes expressed in the prefrontal cortex, controlled for differences in sex, age, postmortem delay and tissue preservation based on RNA integrity estimates (RIN values) among species and populations.

The boxplots show the distribution of divergence estimates measured between chimpanzees and humans of African (AF), Asian (AS) and European (EU) descent for LCP genes directly linked to seven LCP metabolic categories (red) and other LCP genes (gray). The boxes show quartiles and the median of the data, the whiskers extend to the minimum and maximum data values located within 0.5 interquartile range from the box. The variance shown by the boxplots was calculated by bootstrapping RPKM values ( $n=6$  for LCP/metabo and  $n=26$  for LCP/others) 1,000 times. To minimize the influence of environmental differences among populations, gene expression divergence in the LCP term was normalized to the divergence based on all other metabolic pathways within the same population. The numbers above the red boxplots show the proportion of values from the LCP divergence distribution that were smaller than, or equal to, the divergence values calculated based on other metabolic pathways shown by the gray boxplots. The distributions shown are based on residuals of the linear regression models used to exclude possible linear effects of differences in (A) sex, (B) age, (C) postmortem delay and (D) tissue preservation based on RNA integrity estimates (RIN values) among species and populations.

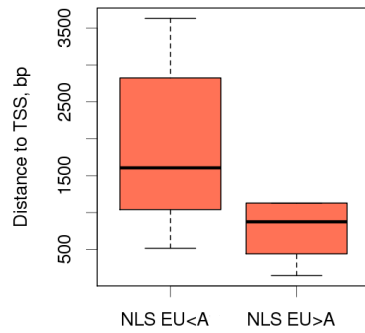

**Supplementary Figure 8.** Distances between NLS located within six LCP genes connected to European-specific metabolic changes and transcription start sites (TSS) of these genes.

On the right, distances to TSS for the polymorphic sites with higher D-score in Europeans compared to Asians and Africans (EU>A,  $n=14$ ), representing European NLS. On the left, distances to TSS for the polymorphic sites with lower D-score in Europeans compared to Asians and Africans (EU<A,  $n=27$ ), representing non-European (Asian) NLS. The boxes show quartiles and the median of the data, the whiskers extend to the minimum and maximum data values located within 0.5 interquartile range from the box.



**Supplementary Table 1.** Average genome-wide proportion of NLS in eleven contemporary human populations calculated as  $(\#ABBA - \#BABA) / (\#ABBA + \#BABA)$ .

|     |        |        |       |        |        |        |        |        |        |        |        |
|-----|--------|--------|-------|--------|--------|--------|--------|--------|--------|--------|--------|
| ASW | 0.000  | 0.014  | 0.015 | -0.051 | -0.050 | -0.048 | -0.047 | -0.048 | -0.046 | -0.046 | -0.044 |
| LWK | -0.014 | 0.000  | 0.001 | -0.063 | -0.062 | -0.061 | -0.059 | -0.060 | -0.058 | -0.058 | -0.057 |
| YRI | -0.015 | -0.001 | 0.000 | -0.063 | -0.063 | -0.062 | -0.060 | -0.06  | -0.059 | -0.059 | -0.057 |
| CHB | 0.051  | 0.063  | 0.063 | 0.000  | 0.001  | 0.003  | 0.005  | 0.004  | 0.006  | 0.006  | 0.008  |
| CHS | 0.050  | 0.062  | 0.063 | -0.001 | 0.000  | 0.002  | 0.004  | 0.003  | 0.005  | 0.005  | 0.007  |
| JPT | 0.048  | 0.061  | 0.062 | -0.003 | -0.002 | 0.000  | 0.002  | 0.002  | 0.003  | 0.004  | 0.005  |
| CEU | 0.047  | 0.059  | 0.060 | -0.005 | -0.004 | -0.002 | 0.000  | -0.001 | 0.002  | 0.001  | 0.003  |
| FIN | 0.048  | 0.060  | 0.060 | -0.004 | -0.003 | -0.002 | 0.001  | 0.000  | 0.002  | 0.002  | 0.004  |
| GBR | 0.046  | 0.058  | 0.059 | -0.006 | -0.005 | -0.003 | -0.002 | -0.002 | 0.000  | 0.000  | 0.002  |
| IBS | 0.046  | 0.058  | 0.059 | -0.006 | -0.005 | -0.004 | -0.001 | -0.002 | 0.000  | 0.000  | 0.001  |
| TSI | 0.045  | 0.058  | 0.058 | -0.007 | -0.006 | -0.004 | -0.003 | -0.003 | -0.002 | -0.001 | 0.000  |

All sites with a sequence difference between chimpanzee and Neanderthal genomes were used ( $n=1,158,559$ ).

**Supplementary Table 2.** Average genome-wide proportion of NLS in eleven contemporary human populations calculated as  $(\#ABBA - \#BABA) / (\#ABBA + \#BABA)$ .

|     | ASW    | LWK   | YRI   | CHB    | CHS    | JPT    | CEU    | FIN    | GBR    | IBS    | TSI    |
|-----|--------|-------|-------|--------|--------|--------|--------|--------|--------|--------|--------|
| ASW | 0.000  | 0.014 | 0.015 | -0.050 | -0.049 | -0.047 | -0.047 | -0.047 | -0.046 | -0.045 | -0.044 |
| LWK | -0.014 | 0.000 | 0.000 | -0.062 | -0.061 | -0.060 | -0.059 | -0.059 | -0.058 | -0.058 | -0.056 |
| YRI | -0.015 | 0.000 | 0.000 | -0.062 | -0.062 | -0.061 | -0.059 | -0.059 | -0.058 | -0.058 | -0.057 |
| CHB | 0.050  | 0.062 | 0.062 | 0.000  | 0.002  | 0.003  | 0.005  | 0.004  | 0.006  | 0.006  | 0.007  |
| CHS | 0.049  | 0.061 | 0.062 | -0.002 | 0.000  | 0.002  | 0.004  | 0.003  | 0.005  | 0.005  | 0.007  |
| JPT | 0.047  | 0.060 | 0.061 | -0.003 | -0.002 | 0.000  | 0.002  | 0.001  | 0.003  | 0.004  | 0.005  |
| CEU | 0.047  | 0.059 | 0.059 | -0.005 | -0.004 | -0.002 | 0.000  | -0.001 | 0.001  | 0.001  | 0.003  |
| FIN | 0.047  | 0.059 | 0.059 | -0.004 | -0.003 | -0.001 | 0.001  | 0.000  | 0.002  | 0.003  | 0.004  |
| GBR | 0.046  | 0.058 | 0.058 | -0.006 | -0.005 | -0.003 | -0.001 | -0.002 | 0.000  | 0.000  | 0.002  |
| IBS | 0.045  | 0.058 | 0.058 | -0.006 | -0.005 | -0.004 | -0.001 | -0.003 | 0.000  | 0.000  | 0.001  |
| TSI | 0.045  | 0.057 | 0.057 | -0.007 | -0.006 | -0.004 | -0.002 | -0.003 | -0.001 | -0.001 | 0.001  |

Only sites with a sequence difference between chimpanzee and Neanderthal genomes and showing substitution types potentially representing the results of DNA damage characteristic of ancient DNA samples (C/T and A/G substitutions) were used ( $n=803,089$ ).

**Supplementary Table 3.** Average genome-wide proportion of NLS in eleven contemporary human populations calculated as  $(\#ABBA - \#BABA) / (\#ABBA + \#BABA)$ .

|     | ASW    | LWK    | YRI   | CHB    | CHS    | JPT    | CEU    | FIN    | GBR    | IBS    | TSI    |
|-----|--------|--------|-------|--------|--------|--------|--------|--------|--------|--------|--------|
| ASW | 0.000  | 0.014  | 0.015 | -0.052 | -0.053 | -0.050 | -0.049 | -0.049 | -0.048 | -0.048 | -0.046 |
| LWK | -0.014 | 0.000  | 0.001 | -0.065 | -0.064 | -0.062 | -0.061 | -0.061 | -0.060 | -0.060 | -0.059 |
| YRI | -0.015 | -0.001 | 0.000 | -0.066 | -0.065 | -0.064 | -0.062 | -0.062 | -0.062 | -0.062 | -0.059 |
| CHB | 0.052  | 0.065  | 0.066 | 0.000  | 0.001  | 0.003  | 0.006  | 0.004  | 0.006  | 0.006  | 0.008  |
| CHS | 0.053  | 0.064  | 0.065 | -0.001 | 0.000  | 0.002  | 0.004  | 0.004  | 0.005  | 0.005  | 0.008  |
| JPT | 0.050  | 0.062  | 0.064 | -0.003 | -0.002 | 0.000  | 0.003  | 0.002  | 0.003  | 0.003  | 0.006  |
| CEU | 0.049  | 0.061  | 0.062 | -0.006 | -0.004 | -0.003 | 0.000  | -0.001 | 0.002  | 0.001  | 0.003  |
| FIN | 0.049  | 0.061  | 0.062 | -0.004 | -0.004 | -0.002 | 0.001  | 0.000  | 0.001  | 0.000  | 0.003  |
| GBR | 0.048  | 0.060  | 0.062 | -0.006 | -0.005 | -0.003 | -0.002 | -0.001 | 0.000  | 0.000  | 0.002  |
| IBS | 0.048  | 0.060  | 0.062 | -0.006 | -0.005 | -0.003 | -0.001 | 0.000  | 0.000  | 0.000  | 0.001  |
| TSI | 0.047  | 0.059  | 0.060 | -0.007 | -0.007 | -0.005 | -0.003 | -0.003 | -0.002 | -0.001 | 0.000  |

Only sites with a sequence difference between chimpanzee and Neanderthal genomes, excluding sites showing substitution types potentially representing the results of DNA damage characteristic of ancient DNA samples (C/T and A/G substitutions), were used ( $n=355,470$ ).

**Supplementary Table 4.** Average proportion of NLS in ten contemporary human populations compared to YRI population and calculated as  $(\#ABBA - \#BABA) / (\#ABBA + \#BABA)$ .

|         | LCP genes |        |       | Whole genome |        |       |
|---------|-----------|--------|-------|--------------|--------|-------|
|         | C/T + A/G | Others | Total | C/T + A/G    | Others | Total |
| ASW_YRI | 0.046     | 0.064  | 0.051 | 0.015        | 0.015  | 0.015 |
| CEU_YRI | 0.201     | 0.229  | 0.208 | 0.059        | 0.062  | 0.060 |
| CHB_YRI | 0.017     | 0.183  | 0.068 | 0.062        | 0.066  | 0.063 |
| CHS_YRI | 0.009     | 0.179  | 0.060 | 0.062        | 0.065  | 0.063 |
| FIN_YRI | 0.169     | 0.210  | 0.182 | 0.059        | 0.062  | 0.06  |
| GBR_YRI | 0.191     | 0.234  | 0.202 | 0.058        | 0.062  | 0.059 |
| IBS_YRI | 0.236     | 0.292  | 0.252 | 0.058        | 0.062  | 0.059 |
| JPT_YRI | 0.020     | 0.198  | 0.074 | 0.061        | 0.064  | 0.062 |
| LWK_YRI | 0.007     | 0.035  | 0.015 | 0.000        | 0.001  | 0.001 |
| TSI_YRI | 0.182     | 0.231  | 0.196 | 0.057        | 0.060  | 0.058 |

The left panel represents the proportions of sites in genes annotated in the LCP term. The right panel represents the genome average. The proportions are shown for the genomic sites with substitution types potentially caused by DNA damage characteristic of ancient DNA samples (C/T + A/G), for genomic sites containing all other substitution types (Others), and for the total of all genomic sites with a sequence difference between the chimpanzee and the Neanderthal genomes (Total).

**Supplementary Table 5.** Genomic coordinates of genes in the LCP term (hg19 version), which demonstrate the greatest excess of NLS in populations with European ancestry.

| Ensembl Gene ID | Gene Name | Chr | Start (bp) | End (bp)  | Description                                                                                                     |
|-----------------|-----------|-----|------------|-----------|-----------------------------------------------------------------------------------------------------------------|
| ENSG00000117054 | ACADM     | 1   | 76190036   | 76253260  | acyl-CoA dehydrogenase, C-4 to C-12 straight chain                                                              |
| ENSG00000122971 | ACADS     | 12  | 121163538  | 121177811 | acyl-CoA dehydrogenase, C-2 to C-3 short chain                                                                  |
| ENSG00000072778 | ACADVL    | 17  | 7120444    | 7128592   | acyl-CoA dehydrogenase, very long chain                                                                         |
| ENSG00000122787 | AKR1D1    | 7   | 137687070  | 137802732 | aldo-keto reductase family 1, member D1                                                                         |
| ENSG00000112294 | ALDH5A1   | 6   | 24495080   | 24537435  | aldehyde dehydrogenase 5 family, member A1                                                                      |
| ENSG00000132855 | ANGPTL3   | 1   | 63063158   | 63071830  | angiopoietin-like 3                                                                                             |
| ENSG00000110244 | APOA4     | 11  | 116691419  | 116694022 | apolipoprotein A-IV                                                                                             |
| ENSG00000110243 | APOA5     | 11  | 116660083  | 116663136 | apolipoprotein A-V                                                                                              |
| ENSG00000164039 | BDH2      | 4   | 104000592  | 104021040 | 3-hydroxybutyrate dehydrogenase, type 2                                                                         |
| ENSG00000170835 | CEL       | 9   | 135937365  | 135947248 | carboxyl ester lipase                                                                                           |
| ENSG00000176194 | CIDEA     | 18  | 12254318   | 12277594  | cell death-inducing DFFA-like effector a                                                                        |
| ENSG00000110090 | CPT1A     | 11  | 68522088   | 68611878  | carnitine palmitoyltransferase 1A (liver)                                                                       |
| ENSG00000205560 | CPT1B     | 22  | 51007290   | 51017899  | carnitine palmitoyltransferase 1B (muscle)                                                                      |
| ENSG00000036530 | CYP46A1   | 14  | 100150641  | 100193638 | cytochrome P450, family 46, subfamily A, polypeptide 1                                                          |
| ENSG00000104823 | ECH1      | 19  | 39306062   | 39322645  | enoyl CoA hydratase 1, peroxisomal                                                                              |
| ENSG00000127884 | ECHS1     | 10  | 135175984  | 135187193 | enoyl CoA hydratase, short chain, 1, mitochondrial                                                              |
| ENSG00000102393 | GLA       | X   | 100652791  | 100662913 | galactosidase, alpha                                                                                            |
| ENSG00000131373 | HACL1     | 3   | 15602211   | 15643338  | 2-hydroxyacyl-CoA lyase 1                                                                                       |
| ENSG00000138029 | HADHB     | 2   | 26466038   | 26513336  | hydroxyacyl-CoA dehydrogenase/3-ketoacyl-CoA thiolase/enoyl-CoA hydratase (trifunctional protein), beta subunit |
| ENSG00000101323 | HAO1      | 20  | 7863628    | 7921121   | hydroxyacid oxidase (glycolate oxidase) 1 [Source:HGNC Symbol;Acc:4809]                                         |
| ENSG00000116882 | HAO2      | 1   | 119911402  | 119936753 | hydroxyacid oxidase 2 (long chain)                                                                              |
| ENSG00000198189 | HSD17B11  | 4   | 88257762   | 88312538  | hydroxysteroid (17-beta) dehydrogenase 11                                                                       |
| ENSG00000087076 | HSD17B14  | 19  | 49316274   | 49339935  | hydroxysteroid (17-beta) dehydrogenase 14                                                                       |
| ENSG00000025423 | HSD17B6   | 12  | 57145945   | 57181574  | hydroxysteroid (17-beta) dehydrogenase 6                                                                        |
| ENSG00000162139 | NEU3      | 11  | 74699179   | 74729938  | sialidase 3 (membrane sialidase)                                                                                |
| ENSG00000103066 | PLA2G15   | 16  | 68279207   | 68294961  | phospholipase A2, group XV                                                                                      |
| ENSG00000243708 | PLA2G4B   | 15  | 42120283   | 42140345  | phospholipase A2, group IVB (cytosolic)                                                                         |
| ENSG00000105499 | PLA2G4C   | 19  | 48551100   | 48614074  | phospholipase A2, group IVC (cytosolic, calcium-independent)                                                    |
| ENSG00000100344 | PNPLA3    | 22  | 44319619   | 44360368  | patatin-like phospholipase domain containing 3                                                                  |
| ENSG00000186951 | PPARA     | 22  | 46546424   | 46639653  | peroxisome proliferator-activated receptor alpha                                                                |
| ENSG00000112033 | PPARD     | 6   | 35310335   | 35395968  | peroxisome proliferator-activated receptor delta                                                                |
| ENSG00000131238 | PPT1      | 1   | 40538379   | 40563375  | palmitoyl-protein thioesterase 1                                                                                |
| ENSG00000117592 | PRDX6     | 1   | 173446405  | 173457946 | peroxiredoxin 6                                                                                                 |
| ENSG00000103056 | SMPD3     | 16  | 68392231   | 68482591  | sphingomyelin phosphodiesterase 3, neutral membrane (neutral sphingomyelinase II)                               |
| ENSG00000136699 | SMPD4     | 2   | 130908981  | 130940323 | sphingomyelin phosphodiesterase 4, neutral                                                                      |

|                 |        |    |          |          |                                                                                         |
|-----------------|--------|----|----------|----------|-----------------------------------------------------------------------------------------|
|                 |        |    |          |          | membrane (neutral sphingomyelinase-3)                                                   |
| ENSG00000101846 | STS    | X  | 7137497  | 7272851  | steroid sulfatase (microsomal), isozyme S                                               |
| ENSG00000156096 | UGT2B4 | 4  | 70345883 | 70391732 | UDP glucuronosyltransferase 2 family, polypeptide B4                                    |
| ENSG00000128245 | YWHAH  | 22 | 32340447 | 32353590 | tyrosine 3-monooxygenase/tryptophan 5-monooxygenase activation protein, eta polypeptide |

The genes are located in 38 independent genomic regions and are uniformly distributed on human chromosomes.

**Supplementary Table 6.** Numbers of NLS and Neanderthal-chimpanzee divergent sites in LCP genes.

| Gene            | NLS | Divergent sites | Gene length (nt) |
|-----------------|-----|-----------------|------------------|
| ENSG00000072778 | 0   | 0               | 8148             |
| ENSG00000101846 | 0   | 0               | 135354           |
| ENSG00000102393 | 0   | 0               | 10122            |
| ENSG00000103066 | 0   | 0               | 15754            |
| ENSG00000110244 | 0   | 0               | 2603             |
| ENSG00000128245 | 0   | 0               | 13143            |
| ENSG00000136699 | 0   | 0               | 31342            |
| ENSG00000243708 | 0   | 0               | 10372            |
| ENSG00000025423 | 0   | 1               | 35629            |
| ENSG00000110243 | 0   | 1               | 3053             |
| ENSG00000132855 | 0   | 1               | 8672             |
| ENSG00000116882 | 0   | 2               | 25351            |
| ENSG00000170835 | 0   | 2               | 9883             |
| ENSG00000122971 | 0   | 4               | 14273            |
| ENSG00000176194 | 0   | 4               | 23276            |
| ENSG00000104823 | 1   | 3               | 16429            |
| ENSG00000112294 | 1   | 3               | 42355            |
| ENSG00000162139 | 1   | 6               | 30759            |
| ENSG00000164039 | 1   | 13              | 20448            |
| ENSG00000138029 | 2   | 21              | 47298            |
| ENSG00000087076 | 3   | 5               | 23655            |
| ENSG00000205560 | 3   | 6               | 10609            |
| ENSG00000156096 | 3   | 21              | 45849            |
| ENSG00000036530 | 3   | 23              | 42997            |
| ENSG00000110090 | 3   | 26              | 89790            |
| ENSG00000131238 | 4   | 12              | 24996            |
| ENSG00000117592 | 5   | 6               | 11541            |
| ENSG00000112033 | 6   | 38              | 85633            |
| ENSG00000103056 | 7   | 21              | 90360            |
| ENSG00000127884 | 9   | 12              | 11209            |
| ENSG00000198189 | 9   | 25              | 54776            |
| ENSG00000100344 | 9   | 35              | 40749            |
| ENSG00000122787 | 9   | 40              | 115662           |
| ENSG00000131373 | 10  | 14              | 41127            |
| ENSG00000101323 | 14  | 29              | 57493            |
| ENSG00000117054 | 14  | 29              | 63224            |
| ENSG00000186951 | 16  | 42              | 93229            |
| ENSG00000105499 | 35  | 53              | 63009            |

**Supplementary Table 7.** Average proportion of NLS for the samples with high genome coverage (12x whole genome coverage or higher) calculated as  $(\#ABBA - \#BABA) / (\#ABBA + \#BABA)$ .

|         | LCP genes |        |       | Whole genome |        |       |
|---------|-----------|--------|-------|--------------|--------|-------|
|         | C/T + A/G | Others | Total | C/T + A/G    | Others | Total |
| ASW_YRI | 0.097     | 0.117  | 0.101 | 0.015        | 0.016  | 0.015 |
| CEU_YRI | 0.334     | 0.110  | 0.263 | 0.060        | 0.065  | 0.061 |
| CHB_YRI | 0.112     | 0.205  | 0.141 | 0.063        | 0.066  | 0.064 |
| CHS_YRI | NA        | NA     | NA    | NA           | NA     | NA    |
| FIN_YRI | 0.174     | 0.165  | 0.172 | 0.059        | 0.061  | 0.059 |
| GBR_YRI | 0.248     | 0.237  | 0.242 | 0.059        | 0.062  | 0.060 |
| IBS_YRI | 0.296     | 0.258  | 0.282 | 0.057        | 0.061  | 0.058 |
| JPT_YRI | 0.090     | 0.219  | 0.132 | 0.060        | 0.065  | 0.062 |
| LWK_YRI | 0.059     | -0.022 | 0.037 | 0.002        | 0.003  | 0.002 |
| TSI_YRI | NA        | NA     | NA    | NA           | NA     | NA    |

The left panel represents the proportions of sites in genes annotated in the LCP term. The right panel represents the genome average. The proportions are shown for the genomic sites with substitution types potentially caused by DNA damage characteristic of ancient DNA samples (C/T + A/G), for genomic sites containing all other substitution types (Others), and for the total of all genomic sites with a sequence difference between the chimpanzee and the Neanderthal genomes (Total).



**Supplementary Table 8.** Average proportion of NLS in individuals of African, East Asian and European ancestry with high genome coverage available in the Complete Genomics diversity set.

|         | LCP genes |        |              | Whole genome |        |              |
|---------|-----------|--------|--------------|--------------|--------|--------------|
|         | C/T + A/G | Others | Total        | C/T + A/G    | Others | Total        |
| ASW_YRI | 0.090     | 0.011  | <b>0.065</b> | 0.013        | 0.013  | <b>0.013</b> |
| LWK_YRI | 0.043     | 0.179  | <b>0.084</b> | 0.000        | 0.001  | <b>0.001</b> |
| MKK_YRI | 0.138     | 0.052  | <b>0.112</b> | 0.010        | 0.012  | <b>0.011</b> |
| CHB_YRI | 0.067     | 0.241  | <b>0.124</b> | 0.059        | 0.062  | <b>0.060</b> |
| JPT_YRI | 0.029     | 0.106  | <b>0.054</b> | 0.063        | 0.063  | <b>0.063</b> |
| CEU_YRI | 0.277     | 0.178  | <b>0.245</b> | 0.056        | 0.054  | <b>0.055</b> |
| TSI_YRI | 0.201     | 0.187  | <b>0.197</b> | 0.054        | 0.058  | <b>0.055</b> |

ASW - HapMap African ancestry individuals from SW US, CEU - CEPH individuals, CHB - Han Chinese in Beijing, JPT - Japanese individuals, LWK - Luhya individuals, MKK - Maasai in Kenya, TSI - Toscan individuals, and YRI - Yoruba individuals. The proportion was calculated as  $(\#ABBA - \#BABA) / (\#ABBA + \#BABA)$ . The left panel represents the proportions of sites in genes annotated with the LCP term. The right panel represents the genome average. The proportions are shown for the genomic sites with substitution types potentially caused by DNA damage characteristic of ancient DNA samples (C/T + A/G), for genomic sites containing all other substitution types (Others), and for the total of all genomic sites with a sequence difference between the chimpanzee and the Neanderthal genomes (Total).

**Supplementary Table 9.** Average proportion of NLS in ten contemporary human populations compared to YRI population.

|         | LCP genes |         |              | Whole genome |         |              |
|---------|-----------|---------|--------------|--------------|---------|--------------|
|         | Altai     | Vindjia | Combined     | Altai        | Vindjia | Combined     |
| ASW_YRI | 0.039     | 0.052   | <b>0.051</b> | 0.015        | 0.015   | <b>0.015</b> |
| CEU_YRI | 0.153     | 0.240   | <b>0.208</b> | 0.060        | 0.059   | <b>0.060</b> |
| CHB_YRI | 0.103     | 0.118   | <b>0.068</b> | 0.063        | 0.063   | <b>0.063</b> |
| CHS_YRI | 0.111     | 0.127   | <b>0.060</b> | 0.063        | 0.063   | <b>0.063</b> |
| FIN_YRI | 0.129     | 0.242   | <b>0.182</b> | 0.060        | 0.059   | <b>0.059</b> |
| GBR_YRI | 0.133     | 0.233   | <b>0.202</b> | 0.059        | 0.059   | <b>0.059</b> |
| IBS_YRI | 0.180     | 0.261   | <b>0.252</b> | 0.059        | 0.058   | <b>0.059</b> |
| JPT_YRI | 0.107     | 0.129   | <b>0.074</b> | 0.062        | 0.062   | <b>0.062</b> |
| LWK_YRI | 0.033     | 0.017   | <b>0.015</b> | 0.001        | 0.001   | <b>0.001</b> |
| TSI_YRI | 0.155     | 0.240   | <b>0.196</b> | 0.058        | 0.057   | <b>0.058</b> |

Proportions were calculated using the Altai and Vindjia Neanderthal genomes separately, or using the consensus genome built using both Neanderthal genomes (Combined). The proportions are shown for LCP genes and for the entire genome: the total of all genomic sites with a sequence difference between the chimpanzee and the Neanderthal genomes.

**Supplementary Table 10.** Genes within the LCP term detected in the RNA-seq data that are directly linked to the seven metabolic categories within the LCP pathway.

| Gene name | Linked metabolites *   | Gene function **                                                                                                                                                                                                                                                                                                                                                                                                                                                                                                                                                                                                                                                                                                                                                                                                                    |
|-----------|------------------------|-------------------------------------------------------------------------------------------------------------------------------------------------------------------------------------------------------------------------------------------------------------------------------------------------------------------------------------------------------------------------------------------------------------------------------------------------------------------------------------------------------------------------------------------------------------------------------------------------------------------------------------------------------------------------------------------------------------------------------------------------------------------------------------------------------------------------------------|
| CEL       | C00422, C02530         | GO:0006629 lipid metabolic process; GO:0006641 triglyceride metabolic process; GO:0006707 cholesterol catabolic process; GO:0009062 fatty acid catabolic process; GO:0018350 protein esterification; GO:0030157 pancreatic juice secretion; GO:0030299 intestinal cholesterol absorption; GO:0044241 lipid digestion; GO:0044258 intestinal lipid catabolic process; GO:0044281 small molecule metabolic process; GO:0046514 ceramide catabolic process                                                                                                                                                                                                                                                                                                                                                                             |
| PLA2G15   | C04230                 | GO:0006672 ceramide metabolic process; GO:0009062 fatty acid catabolic process; GO:0046470 phosphatidylcholine metabolic process; GO:0006629 lipid metabolic process                                                                                                                                                                                                                                                                                                                                                                                                                                                                                                                                                                                                                                                                |
| PLA2G4B   | C00350, C04230, C00157 | GO:0006644 phospholipid metabolic process; GO:0006654 phosphatidic acid biosynthetic process; GO:0006954 inflammatory response; GO:0006987 activation of signaling protein activity involved in unfolded protein response; GO:0007567 parturition; GO:0019369 arachidonic acid metabolic process; GO:0019722 calcium-mediated signaling; GO:0030968 endoplasmic reticulum unfolded protein response; GO:0036148 phosphatidylglycerol acyl-chain remodeling; GO:0036150 phosphatidylserine acyl-chain remodeling; GO:0036151 phosphatidylcholine acyl-chain remodeling; GO:0036152 phosphatidylethanolamine acyl-chain remodeling; GO:0044267 cellular protein metabolic process; GO:0044281 small molecule metabolic process; GO:0046474 glycerophospholipid biosynthetic process; GO:0046475 glycerophospholipid catabolic process |
| PLA2G4C   | C00350, C04230, C00157 | GO:0006644 phospholipid metabolic process; GO:0006954: inflammatory response; GO:0007567 parturition; GO:0019369 arachidonic acid metabolic process; GO:0035556 intracellular signal transduction; GO:0036149 phosphatidylinositol acyl-chain remodeling; GO:0036151 phosphatidylcholine acyl-chain remodeling; GO:0036152 phosphatidylethanolamine acyl-chain remodeling; GO:0044281 small molecule metabolic process; GO:0046474 glycerophospholipid biosynthetic process; GO:0046475 glycerophospholipid catabolic process                                                                                                                                                                                                                                                                                                       |
| PNPLA3    | C00422                 | GO:0036155 acylglycerol acyl-chain remodeling; GO:0046474 glycerophospholipid biosynthetic process; GO:0006644 phospholipid metabolic process; GO:0044281 small molecule metabolic process; GO:0019432 triglyceride biosynthetic process; GO:0019433 triglyceride catabolic process                                                                                                                                                                                                                                                                                                                                                                                                                                                                                                                                                 |
| SMPD3     | C00195, C00550         | GO:0007049 cell cycle; GO:0006687 glycosphingolipid metabolic process; GO:0007275 multicellular organismal development; GO:0030072 peptide hormone secretion; GO:0044281 small molecule metabolic process; GO:0006685 sphingomyelin catabolic process                                                                                                                                                                                                                                                                                                                                                                                                                                                                                                                                                                               |

\* KEGG accession numbers of the linked metabolic categories.

\*\* Gene function according to Gene Ontology annotation<sup>20</sup>

**Supplementary Table 11.** Sample information for the prefrontal cortex samples used in metabolite and RNA-seq measurements.

| Species    | Sample_# | RNA-seq | Gender | Age  | RNA RIN | Postmortem | Source   |
|------------|----------|---------|--------|------|---------|------------|----------|
| Human_EU   | 1        | Y       | M      | 21,9 | 9,7     | 13         | Maryland |
| Human_AF   | 2        | Y       | M      | 22,9 | 7,3     | 4          | Maryland |
| Human_EU   | 3        | Y       | M      | 27,1 | 8,8     | 15         | Maryland |
| Human_EU   | 4        | Y       | M      | 30   | 7,4     | 19         | Maryland |
| Human_AS   | 5        | Y       | M      | 37   | 6,9     | 5          | Wuhan    |
| Human_AF   | 6        | Y       | M      | 38,6 | 7,3     | 5          | Maryland |
| Human_AS   | 7        | Y       | F      | 47   | 7,4     | 5          | Wuhan    |
| Human_AF   | 8        | Y       | M      | 50,4 | 6,9     | 8          | Maryland |
| Human_AS   | 9        | Y       | F      | 52   | 6,8     | 5          | Wuhan    |
| Human_AS   | 10       | Y       | F      | 52   | 7,1     | 4          | Wuhan    |
| Human_EU   | 11       | Y       | M      | 53,6 | 6,7     | 19         | Maryland |
| Human_AF   | 12       | Y       | M      | 58,1 | 8,4     | 9          | Maryland |
| Human_AS   | 13       | Y       | F      | 59   | 6,5     | 5          | Wuhan    |
| Human_EU   | 14       | Y       | M      | 61,5 | 8,8     | 6          | Maryland |
| Chimpanzee | 1        | Y       | F      | 27,9 | 8,2     | 5          | Irchel   |
| Chimpanzee | 2        | Y       | F      | 41,8 | 7,1     | 6          | Irchel   |
| Chimpanzee | 3        | Y       | M      | 37,8 | 8,5     | 5          | Irchel   |
| Chimpanzee | 4        | Y       | F      | 21,4 | 7,6     | 5          | Yerkes   |
| Chimpanzee | 5        | Y       | M      | 26,4 | 7,9     | 5          | Yerkes   |
| Chimpanzee | 6        | Y       | M      | 22,7 | 7       | 4          | Yerkes   |
| Chimpanzee | 7        | N       | F      | 43,4 | 8,7     | 4          | BPRC     |
| Chimpanzee | 8        | N       | F      | 39,9 | 8,3     | 5          | BPRC     |
| Chimpanzee | 9        | N       | F      | 31,7 | 7,8     | 5          | BPRC     |
| Chimpanzee | 10       | N       | M      | 28,3 | 7,5     | 10         | BPRC     |
| Chimpanzee | 11       | N       | F      | 20,2 | 7,7     | 5          | BPRC     |
| Chimpanzee | 12       | N       | F      | 20,5 | 6,9     | 5          | BPRC     |
| Chimpanzee | 13       | N       | M      | 24,3 | 7,8     | 6          | BPRC     |
| Chimpanzee | 14       | N       | M      | 10,4 | 7,3     | 5          | BPRC     |

In the “Species” column, EU stands for European ancestry, AS stands for Asian ancestry, and AF stands for African ancestry. Six of the 14 chimpanzee samples that were used for RNA-seq measurements are marked with “Y” in the “RNA-seq” column. For all individuals, listed are: sex (M/F), age (in years), RNA RIN (RNA Integrity Number – values over 7 indicate excellent RNA preservation), postmortem delay (in hours), and sample source (‘Maryland’ stands for the NICHD Brain and Tissue Bank for Developmental Disorders at the University of Maryland, USA; ‘Wuhan’ stands for the Chinese Wuhan Xiehe Hospital, China; ‘Irchel’ stands for the Anthropological Institute & Museum of the University of Zürich-Irchel, Switzerland; ‘Yerkes’ stands for the Yerkes Primate Center, USA; and ‘BPRC’ stands for the Biomedical Primate

Research Centre, the Netherlands).

**Supplementary Table 12.** RNA-seq read mapping statistics for the 14 human samples and 6 chimpanzee prefrontal cortex samples used for RNA-seq measurements.

| Species    | Sample_# | Total_reads | Unique_mapped | Multiple_mapped | Unique_% | Multiple_% |
|------------|----------|-------------|---------------|-----------------|----------|------------|
| Human_EU   | 1        | 17052134    | 14653755      | 1085887         | 85.94    | 6.37       |
| Human_AF   | 2        | 17670579    | 15215644      | 1118161         | 86.11    | 6.33       |
| Human_EU   | 3        | 15644246    | 13421192      | 1020370         | 85.79    | 6.52       |
| Human_EU   | 4        | 14955507    | 11691156      | 2082619         | 78.17    | 13.93      |
| Human_AS   | 5        | 14269905    | 12248034      | 837581          | 85.83    | 5.87       |
| Human_AF   | 6        | 14842000    | 12837513      | 805565          | 86.49    | 5.43       |
| Human_AS   | 7        | 14171211    | 12079821      | 942723          | 85.24    | 6.65       |
| Human_AF   | 8        | 14982206    | 12679276      | 1024410         | 84.63    | 6.84       |
| Human_AS   | 9        | 15540198    | 13496533      | 723758          | 86.85    | 4.66       |
| Human_AS   | 10       | 15027750    | 13153203      | 679557          | 87.53    | 4.52       |
| Human_EU   | 11       | 14190548    | 10436837      | 2584520         | 73.55    | 18.21      |
| Human_AF   | 12       | 15134633    | 13188007      | 709308          | 87.14    | 4.69       |
| Human_AS   | 13       | 15124547    | 13065560      | 815535          | 86.39    | 5.39       |
| Human_EU   | 14       | 16085282    | 13994069      | 829696          | 87.00    | 5.16       |
| Chimpanzee | 1        | 3977099     | 3086707       | 185344          | 77.61    | 4.66       |
| Chimpanzee | 2        | 3887122     | 2979788       | 194046          | 76.66    | 4.99       |
| Chimpanzee | 3        | 5965770     | 4179508       | 304563          | 70.06    | 5.11       |
| Chimpanzee | 4        | 4473074     | 3417107       | 240112          | 76.39    | 5.37       |
| Chimpanzee | 5        | 5029692     | 3769145       | 259822          | 74.94    | 5.17       |
| Chimpanzee | 6        | 4312534     | 3357557       | 207772          | 77.86    | 4.82       |

In the “Species” column, EU stands for European ancestry, AS stands for Asian ancestry, and AF stands for African ancestry. Listed are: total sequence reads number (Total\_reads), number of sequence reads that uniquely mapped to the corresponding genome (Unique\_mapped) and the corresponding percentage of total reads (Unique\_%), number of sequence reads that mapped to the corresponding genome at multiple genomic locations (Multiple\_mapped) and the corresponding percentage of total reads (Multiple\_%).

**Supplementary Table 13.** Human disease terms containing enriched numbers of LCP genes, according to the Genetic Association Database<sup>34</sup>.

| Disease term                                                           | Count | PValue  | Genes                                                                                                                                                       | Fold Enrichment | Benjamini | FDR    |
|------------------------------------------------------------------------|-------|---------|-------------------------------------------------------------------------------------------------------------------------------------------------------------|-----------------|-----------|--------|
| obesity                                                                | 8     | 3,3E-06 | ENSG00000176194,<br>ENSG00000186951,<br>ENSG00000205560,<br>ENSG00000112033,<br>ENSG00000110243,<br>ENSG00000110244,<br>ENSG00000100344,<br>ENSG00000110090 | 10,3            | 5,03E-04  | 0,0040 |
| Hypertriglyceridemia                                                   | 3     | 0,0011  | ENSG00000186951,<br>ENSG00000110243,<br>ENSG00000110244                                                                                                     | 53,1            | 0,0836    | 1,3896 |
| cholesterol, HDL cholesterol,<br>LDL lipoprotein triglycerides         | 3     | 0,0033  | ENSG00000186951,<br>ENSG00000110243,<br>ENSG00000110244                                                                                                     | 31,8            | 0,1534    | 3,9215 |
| coronary heart disease                                                 | 4     | 0,0034  | ENSG00000186951,<br>ENSG00000112033,<br>ENSG00000110243,<br>ENSG00000110244                                                                                 | 12,0            | 0,1202    | 4,0180 |
| triglycerides                                                          | 3     | 0,0043  | ENSG00000186951,<br>ENSG00000110243,<br>ENSG00000110244                                                                                                     | 28,1            | 0,1206    | 5,0175 |
| cholesterol                                                            | 3     | 0,0065  | ENSG00000036530,<br>ENSG00000110243,<br>ENSG00000110244                                                                                                     | 22,7            | 0,1507    | 7,5465 |
| cholesterol; triglycerides                                             | 2     | 0,0118  | ENSG00000186951,<br>ENSG00000110243                                                                                                                         | 159,3           | 0,2242    | 13,260 |
| cholesterol, HDL; triglycerides;<br>diabetes, type 2; cholesterol, LDL | 2     | 0,0118  | ENSG00000186951,<br>ENSG00000112033                                                                                                                         | 159,3           | 0,2242    | 13,260 |
| medium-chain acyl-CoA<br>dehydrogenase deficiency                      | 2     | 0,0118  | ENSG00000122971,<br>ENSG00000117054                                                                                                                         | 159,3           | 0,2242    | 13,260 |
| left ventricular hypertrophy                                           | 3     | 0,0131  | ENSG00000186951,<br>ENSG00000205560,<br>ENSG00000110090                                                                                                     | 15,9            | 0,2186    | 14,614 |
| metabolic syndrome                                                     | 3     | 0,0140  | ENSG00000186951,<br>ENSG00000112033,<br>ENSG00000110243                                                                                                     | 15,4            | 0,2084    | 15,496 |
| triglycerides; atherosclerosis,<br>coronary; hypertriglyceridemia      | 2     | 0,0177  | ENSG00000110243,<br>ENSG00000110244                                                                                                                         | 106,2           | 0,2340    | 19,218 |
| triglycerides; atherosclerosis,<br>coronary; lipoprotein               | 2     | 0,0177  | ENSG00000186951,<br>ENSG00000112033                                                                                                                         | 106,2           | 0,2340    | 19,218 |
| body mass; lipids                                                      | 2     | 0,0235  | ENSG00000110243,<br>ENSG00000110244                                                                                                                         | 79,6            | 0,2761    | 24,769 |
| atherosclerosis, coronary;<br>lipoprotein                              | 2     | 0,0235  | ENSG00000110243,<br>ENSG00000110244                                                                                                                         | 79,6            | 0,2761    | 24,769 |
| cholesterol cholesterol, HDL<br>triglycerides                          | 2     | 0,0235  | ENSG00000110243,<br>ENSG00000110244                                                                                                                         | 79,6            | 0,2761    | 24,769 |
| heart disease, ischemic                                                | 3     | 0,0260  | ENSG00000186951,<br>ENSG00000110243,<br>ENSG00000110244                                                                                                     | 11,1            | 0,2798    | 27,052 |
| atherosclerosis, coronary<br>hyperlipidemia                            | 2     | 0,0351  | ENSG00000186951,<br>ENSG00000112033                                                                                                                         | 53,1            | 0,3365    | 34,757 |
| cholesterol, HDL triglycerides                                         | 2     | 0,0466  | ENSG00000110243,<br>ENSG00000110244                                                                                                                         | 39,8            | 0,3984    | 43,424 |

|                     |   |        |                                                                                                 |     |        |        |
|---------------------|---|--------|-------------------------------------------------------------------------------------------------|-----|--------|--------|
| Alzheimer's Disease | 5 | 0,0480 | ENSG00000186951,<br>ENSG00000112033,<br>ENSG00000036530,<br>ENSG00000110243,<br>ENSG00000110244 | 3,3 | 0,3865 | 44,391 |
|---------------------|---|--------|-------------------------------------------------------------------------------------------------|-----|--------|--------|

Fisher's exact test  $p$ -values, fold enrichments, Benjamini-corrected Fisher's exact test  $p$ -values and FDR were estimated using DAVID functional annotation tool<sup>33</sup> with default parameters. Only diseases with  $p$ -values lower than 0.05 are listed.

**Supplementary Table 14.** Denisova sequence at sites showing sequence divergence between the Neanderthal and the chimpanzee genomes located within LCP genes.

| Population | Denisova sequence | Divergent sites | NLS (D>0.3) | %    | NLS (D>0.5) | %            | NLS (D>0.7) | %     |
|------------|-------------------|-----------------|-------------|------|-------------|--------------|-------------|-------|
| EU         | C                 | 80              | 48          | 60.0 | <b>40</b>   | <b>50.00</b> | 33          | 41.25 |
| EU         | H                 | 17              | 3           | 17.6 | <b>3</b>    | <b>17.65</b> | 3           | 17.65 |
| EU         | N                 | 259             | 137         | 52.9 | <b>116</b>  | <b>44.79</b> | 107         | 41.31 |
| AS         | C                 | 72              | 29          | 40.3 | <b>23</b>   | <b>31.94</b> | 22          | 30.56 |
| AS         | H                 | 19              | 6           | 31.6 | <b>6</b>    | <b>31.58</b> | 6           | 31.58 |
| AS         | N                 | 256             | 136         | 53.1 | <b>130</b>  | <b>50.78</b> | 121         | 47.27 |
| AF         | C                 | 75              | 12          | 16.0 | <b>8</b>    | <b>10.67</b> | 8           | 10.67 |
| AF         | H                 | 17              | 0           | 0.0  | <b>0</b>    | <b>0.00</b>  | 0           | 0.00  |
| AF         | N                 | 258             | 37          | 14.3 | <b>9</b>    | <b>3.49</b>  | 4           | 1.55  |

‘C’ stands for the chimpanzee state, ‘H’ stands for the heterozygous sites, ‘N’ stands for the Neanderthal state. The divergent sites are sites showing sequence divergence between the Neanderthal and the chimpanzee genomes located within LCP genes. We estimated whether these sites have a high frequency of Neanderthal genotype in contemporary human populations using the D statistic, *i.e.* whether these sites could be classified as NLS in specific human populations. We note, however, that the D statistic estimates at individual sites are far less reliable than the estimates based on a large numbers of sites. Due to the relatively small numbers of divergent sites, we used relaxed D statistic cutoffs to determine putative NLS resulting in higher frequencies of NLS sites than in the genome wide analysis.
